# Supplementary material for: Second structural directing agent induces the formation of 1D organic templated terbium sulfate
Source: Royal Society of Chemistry journal article supplement (doi:10.1039/c0ce00895h), 2011-01-01

# Second Structural Directing Agent Induces the Formation of 1D Organic Templated Terbium Sulfate

Lei Zheng, Xinmin Qiu, Yan Xu, Jie Fu, Yan Yuan, Dunru Zhu

College of Chemistry and Chemical Engineering, State Key Laboratory of Materials-Oriented Chemical Engineering, Nanjing University of Technology, Nanjing, 210009, PR China.

E-mail: yanxu@njut.edu.cn; Tel: (+86)25-83587857

Table S1 Selected bond lengths (Å) and angles (°) for **1** and **2**.

| 1                                      |            |                            |            |                           |            |
|----------------------------------------|------------|----------------------------|------------|---------------------------|------------|
| Tb1—O1 <sup>i</sup>                    | 2.318(4)   | O1 <sup>i</sup> —Tb1—O11   | 148.99(15) | O4—Tb1—O9                 | 80.25(15)  |
| Tb1—O6                                 | 2.347(4)   | O6—Tb1—O11                 | 86.74(17)  | O11—Tb1—O9                | 57.12(14)  |
| Tb1—O10 <sup>ii</sup>                  | 2.307(4)   | O10 <sup>ii</sup> —Tb1—O11 | 81.54(16)  | O3—Tb1—O9                 | 72.95(14)  |
| Tb1—O4                                 | 2.391(4)   | O10 <sup>ii</sup> —Tb1—O4  | 83.17(14)  | O1 <sup>i</sup> —Tb1—O5   | 74.65(14)  |
| Tb1—O11                                | 2.423(4)   | O4—Tb1—O11                 | 122.40(15) | O6—Tb1—O5                 | 58.43(14)  |
| Tb1—O3                                 | 2.419(4)   | O1 <sup>i</sup> —Tb1—O3    | 80.63(15)  | O10 <sup>ii</sup> —Tb1—O5 | 80.14(15)  |
| Tb1—O9                                 | 2.458(4)   | O6—Tb1—O3                  | 77.31(14)  | O4—Tb1—O5                 | 152.90(15) |
| Tb1—O5                                 | 2.461(4)   | O10 <sup>ii</sup> —Tb1—O3  | 139.63(15) | O11—Tb1—O5                | 76.00(14)  |
| O1—Tb1 <sup>i</sup>                    | 2.318(4)   | O4—Tb1—O3                  | 58.05(14)  | O3—Tb1—O5                 | 129.84(14) |
| O10—Tb1 <sup>ii</sup>                  | 2.307(4)   | O11—Tb1—O3                 | 126.95(15) | O9—Tb1—O5                 | 126.16(14) |
| O1 <sup>i</sup> —Tb1—O6                | 86.37(16)  | O1 <sup>i</sup> —Tb1—O9    | 153.27(15) | O1 <sup>i</sup> —Tb1—O4   | 82.48(14)  |
| O1 <sup>i</sup> —Tb1—O10 <sup>ii</sup> | 83.82(16)  | O6—Tb1—O9                  | 91.62(15)  | O6—Tb1—O4                 | 135.13(14) |
| O6—Tb1—O10 <sup>ii</sup>               | 138.55(15) | O10 <sup>ii</sup> —Tb1—O9  | 113.98(15) |                           |            |
| 2                                      |            |                            |            |                           |            |
| Tb1—O5 <sup>i</sup>                    | 2.432(4)   | O1 <sup>ii</sup> —Tb2—O6   | 71.31(12)  | O3—Tb2—O12                | 85.49(13)  |
| Tb1—O7 <sup>ii</sup>                   | 2.441(4)   | O11—Tb2—O6                 | 134.97(12) | O1 <sup>ii</sup> —Tb2—O12 | 124.38(12) |
| Tb1—O19                                | 2.593(4)   | O18—Tb2—O6                 | 107.96(12) | O11—Tb2—O12               | 152.89(12) |
| Tb1—O6 <sup>iii</sup>                  | 2.608(4)   | O12—Tb2—O6                 | 53.99(11)  | O18—Tb2—O12               | 77.31(14)  |
| Tb2—O2 <sup>ii</sup>                   | 2.446(3)   | O13—Tb2—O6                 | 75.83(12)  | O2 <sup>ii</sup> —Tb2—O13 | 150.78(11) |
| Tb2—O3                                 | 2.469(3)   | O2 <sup>ii</sup> —Tb2—O2   | 69.61(14)  | O3—Tb2—O13                | 132.87(11) |
| Tb2—O1 <sup>ii</sup>                   | 2.511(4)   | O3—Tb2—O2                  | 70.05(12)  | O1 <sup>ii</sup> —Tb2—O13 | 83.32(12)  |
| Tb2—O11                                | 2.515(4)   | O1 <sup>ii</sup> —Tb2—O2   | 67.61(11)  | O11—Tb2—O13               | 70.81(12)  |
| Tb2—O18                                | 2.556(4)   | O11—Tb2—O2                 | 53.99(11)  | O18—Tb2—O13               | 54.33(11)  |
| Tb2—O12                                | 2.587(4)   | O18—Tb2—O2                 | 118.54(12) | O12—Tb2—O13               | 91.89(14)  |

|                                          |            |                           |            |                           |            |
|------------------------------------------|------------|---------------------------|------------|---------------------------|------------|
| Tb2—O13                                  | 2.628(4)   | O12—Tb2—O2                | 146.21(13) | O2 <sup>ii</sup> —Tb2—O6  | 77.60(11)  |
| Tb2—O6                                   | 2.663(3)   | O6—Tb2—O2                 | 131.84(10) | O3—Tb2—O6                 | 133.75(13) |
| Tb2—O2                                   | 2.682(4)   | O1 <sup>ii</sup> —Tb2—O18 | 134.64(13) | O2 <sup>ii</sup> —Tb2—O18 | 148.50(13) |
| Tb3—O23A                                 | 2.282(8)   | O10 <sup>v</sup> —Tb3—O23 | 67.9(2)    | S3—O1—Tb2 <sup>ii</sup>   | 133.5(2)   |
| Tb3—O17 <sup>iv</sup>                    | 2.497(4)   | O23A—Tb3—O9               | 78.6(2)    | S1—O2—Tb2 <sup>ii</sup>   | 150.6(2)   |
| Tb3—O10 <sup>v</sup>                     | 2.542(4)   | O17 <sup>iv</sup> —Tb3—O9 | 125.17(13) | S1—O2—Tb2                 | 96.30(16)  |
| Tb3—O23                                  | 2.583(10)  | O10 <sup>v</sup> —Tb3—O9  | 156.90(12) | Tb2 <sup>ii</sup> —O2—Tb2 | 110.39(14) |
| Tb3—O21A <sup>v</sup>                    | 2.588(9)   | O23A—Tb3—O4               | 96.3(2)    | S3—O3—Tb2                 | 142.3(2)   |
| Tb3—O9                                   | 2.592(4)   | O17 <sup>iv</sup> —Tb3—O4 | 79.41(13)  | S2—O4—Tb3                 | 100.08(19) |
| Tb3—O4                                   | 2.601(4)   | O10 <sup>v</sup> —Tb3—O4  | 126.52(12) | S1—O5—Tb1 <sup>ii</sup>   | 136.5(3)   |
| Tb3—O16                                  | 2.614(4)   | O23—Tb3—O4                | 106.1(2)   | S5—O6—Tb1                 | 99.65(19)  |
| Tb3—O14                                  | 2.644(4)   | O10 <sup>v</sup> —Tb3—O16 | 74.64(12)  | S5—O6—Tb2                 | 97.80(15)  |
| Tb3—O24A <sup>v</sup>                    | 2.735(12)  | O2 <sup>ii</sup> —Tb2—O11 | 123.06(12) | Tb1—O6—Tb2                | 126.77(14) |
| Tb3—O21                                  | 2.747(14)  | O9—Tb3—O16                | 116.79(14) | S3—O7—Tb1 <sup>ii</sup>   | 153.4(2)   |
| O5 <sup>i</sup> —Tb1—O5 <sup>ii</sup>    | 103.05(19) | O4—Tb3—O16                | 54.16(11)  | S4—O9—Tb3                 | 100.6(2)   |
| O7 <sup>i</sup> —Tb1—O7 <sup>ii</sup>    | 132.86(19) | O10 <sup>v</sup> —Tb3—O14 | 139.92(14) | S2—O10—Tb3 <sup>vi</sup>  | 128.3(2)   |
| O5 <sup>i</sup> —Tb1—O19                 | 167.04(14) | O23—Tb3—O14               | 149.0(2)   | S1—O11—Tb2                | 104.2(2)   |
| O7 <sup>ii</sup> —Tb1—O19                | 124.41(13) | O9—Tb3—O14                | 53.87(12)  | S5—O12—Tb2                | 101.9(2)   |
| O5 <sup>ii</sup> —Tb1—O19 <sup>iii</sup> | 167.04(14) | O4—Tb3—O14                | 70.44(12)  | S4—O13—Tb2                | 97.98(18)  |
| O7 <sup>i</sup> —Tb1—O19 <sup>iii</sup>  | 124.41(12) | O16—Tb3—O14               | 120.83(12) | S2—O17—Tb3 <sup>iv</sup>  | 144.2(3)   |
| O5 <sup>i</sup> —Tb1—O6                  | 138.22(13) | O10 <sup>v</sup> —Tb3—O21 | 109.4(2)   | S4—O18—Tb2                | 101.02(18) |
| O7 <sup>i</sup> —Tb1—O6                  | 138.76(13) | O9—Tb3—O21                | 60.4(2)    | S5—O19—Tb1                | 101.4(2)   |
| O6—Tb1—O6 <sup>iii</sup>                 | 103.05(16) | O4—Tb3—O21                | 70.9(3)    | S6—O21—Tb3                | 112.3(7)   |
| O2 <sup>ii</sup> —Tb2—O1 <sup>ii</sup>   | 76.82(12)  | O16—Tb3—O21               | 71.7(3)    | S6—O23—Tb3                | 119.4(6)   |
| O3—Tb2—O1 <sup>ii</sup>                  | 135.20(12) | O14—Tb3—O21               | 110.6(2)   | S6—O23A—Tb3               | 154.5(5)   |

Symmetry transformations used to generate equivalent atoms: **1** (i) -x, -2-y, 1-z; (ii) -x, -2-y, 2-z; **2** (i) 0.5+x, 0.5-y, 0.5+z; (ii) 0.5-x, 0.5-y, 1-z; (iii) 1-x, y, 1.5-z; (iv) -x, y, 0.5-z; (v) x, -y, 0.5+z; (vi) x, -y, -0.5+z; (vii) 1-x, y, 0.5-z.

Table S2 Hydrogen bonds of compounds **1**.

| D—H...A         | D—H(Å)  | H...A(Å) | D...A(Å) | D—H...A(°) |
|-----------------|---------|----------|----------|------------|
| O1W-- H1W...O7  | 0.86(6) | 2.16(6)  | 2.84(1)  | 137        |
| N1-- H1A...O5   | 0.90    | 2.01     | 2.87(1)  | 162        |
| N1-- H1A...O11  | 0.90    | 2.47     | 2.95(1)  | 114        |
| N1-- H1B...O2   | 0.90    | 2.44     | 3.05(1)  | 125        |
| N1-- H1B...O4   | 0.90    | 2.44     | 3.18(1)  | 141        |
| O1W-- H1WB...O4 | 0.88(7) | 2.06(7)  | 2.92(1)  | 173        |
| O1W-- H1WC...O6 | 0.87(7) | 2.38(10) | 2.97(1)  | 126        |
| O1W-- H1WC...O6 | 0.87(7) | 2.28(6)  | 3.01(1)  | 142        |
| O2W-- H2WA...O8 | 0.87(7) | 2.57(11) | 2.92(1)  | 105        |
| O2W-- H2WA...O8 | 0.87(7) | 1.97(8)  | 2.82(1)  | 167        |
| O2W-- H2WB...O9 | 0.87(8) | 2.02(8)  | 2.89(1)  | 173        |
| O2W-- H2WC...O2 | 0.87(9) | 2.41(10) | 3.00(1)  | 126        |
| O2W-- H2WC...O2 | 0.87(9) | 2.10(10) | 2.92(1)  | 158        |

Table S3 Hydrogen bonds of compounds **2**.

| D—H...A         | D—H(Å) | H...A(Å) | D...A(Å) | D—H...A(°) |
|-----------------|--------|----------|----------|------------|
| N1-- H1D...O9   | 0.90   | 2.39     | 2.88(1)  | 114        |
| N1-- H1D...O20  | 0.90   | 2.56     | 3.28(1)  | 138        |
| N1-- H1E...O9   | 0.90   | 2.58     | 2.88(1)  | 101        |
| N1-- H1E...O21  | 0.90   | 1.87     | 2.76(1)  | 173        |
| N1-- H1E...O21A | 0.90   | 2.43     | 3.20(1)  | 144        |
| N1-- H1E...O22  | 0.90   | 2.55     | 3.22(2)  | 132        |
| N3-- H3C...O8   | 0.90   | 1.92     | 2.80(1)  | 166        |
| N4-- H4C...O16  | 0.90   | 2.38     | 2.87(1)  | 115        |
| N4-- H4C...O10  | 0.90   | 2.21     | 2.98(1)  | 144        |
| N4-- H4C...O17  | 0.90   | 2.59     | 3.34(1)  | 142        |
| N5-- H5D...O4   | 0.90   | 2.38     | 3.09(1)  | 136        |
| N5-- H5D...O14  | 0.90   | 2.41     | 3.19 (1) | 146        |
| N6-- H6D...O22A | 0.90   | 2.28     | 2.93(1)  | 130        |
| N6-- H6D...O24  | 0.90   | 1.97     | 2.80(1)  | 154        |
| N6-- H6E...O13  | 0.90   | 2.34     | 2.88(1)  | 119        |
| N6-- H6E...O20  | 0.90   | 2.37     | 3.03(1)  | 131        |
| C1-- H1C...O22A | 0.96   | 2.52     | 3.36(2)  | 147        |
| C2-- H2A...O18  | 0.96   | 2.53     | 3.27(1)  | 135        |
| C2-- H2B...O23  | 0.96   | 2.22     | 3.13(1)  | 159        |
| C2-- H2B...O24  | 0.96   | 2.59     | 3.31(2)  | 133        |
| C5-- H5A...O11  | 0.96   | 2.54     | 3.19(1)  | 126        |
| C6-- H6A...O15  | 0.96   | 2.55     | 3.37(1)  | 144        |
| C6-- H6C...O12  | 0.96   | 2.50     | 3.22(1)  | 132        |
| C7-- H7A...O24A | 0.96   | 2.16     | 3.04(2)  | 153        |

Figure S1 TG curve of compounds **1**.

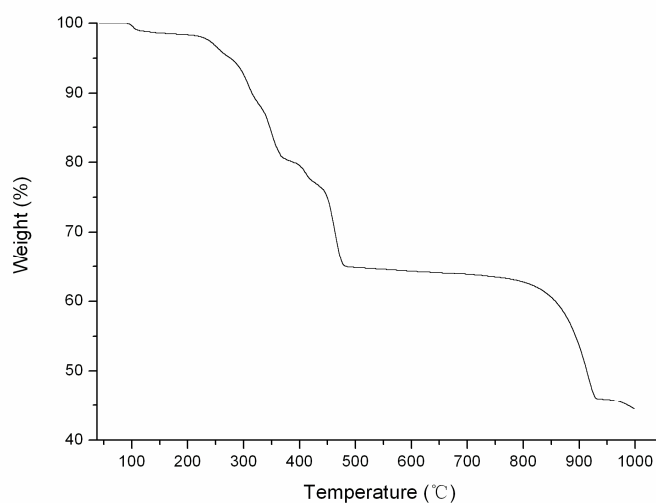

**Figure S2** TG curve of compounds **2**.

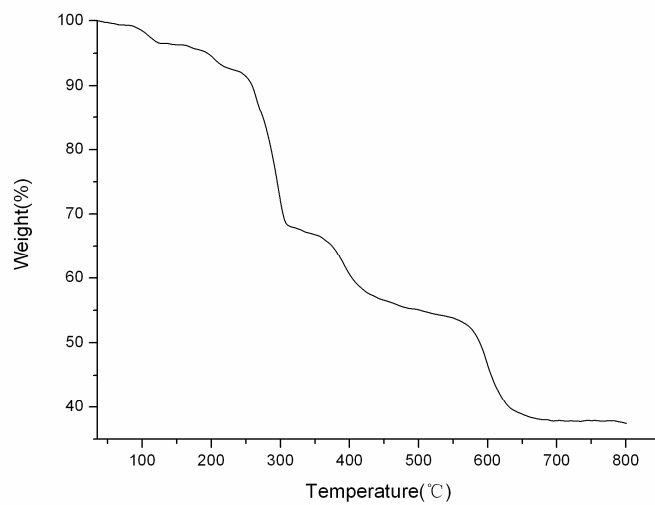

Supplement: c0ce00895h.pdf [file c0ce00895h.pdf]
